# Supplementary material for: Importance of Genetic Polymorphisms in MT1 and MT2 Genes in Metals Homeostasis and Their Relationship with the Risk of Acute Pancreatitis Occurrence in Smokers—Preliminary Findings
Source: MDPI journal article supplement (doi:10.3390/ijms22115725), 2021-05-27
Supplement: s1 [file s1]

**Table S1. The concentration of metals (Cu, Zn), MT, Cp and markers of inflammation and oxidative stress in the group AP patients in terms of etiology of disease**

| Parameters in erythrocyte lysate | Biliary                                   | Alcohol                                    | Alcohol and hyperlipidaemia                | Hyperlipidaemia                         | Other                                     |
|----------------------------------|-------------------------------------------|--------------------------------------------|--------------------------------------------|-----------------------------------------|-------------------------------------------|
| MT [ng/g Hb]                     | 28.3 ± 4.7<br>(23.7; 30.2; 31.8)          | 27.5 ± 4.7<br>(23.7; 26.9; 29.6)           | 28.7 ± 4.1<br>(26.4; 28.6; 30.8)           | 27.3 ± 7.6<br>(21.1; 25.7; 33.6)        | 26.0 ± 6.0<br>(23.3; 26.9; 29.7)          |
| SODs [U/g Hb]                    | 421.4 ± 99.5<br>(340.2; 389.6; 534.6)     | 459.3 ± 82.3<br>(392.5; 440.2; 556.2)      | 392.1 ± 72.2<br>(332.6; 371.2; 472.5)      | 436.5 ± 103.6<br>(357.1; 398.5; 553.7)  | 398.1 ± 66.3<br>(8.0; 9.4; 10.7)          |
| Parameters in plasma             | Biliary                                   | Alcohol                                    | Alcohol and hyperlipidaemia                | Hyperlipidaemia                         | Other                                     |
| MT [ng/ml]                       | 1.9 ± 0.2<br>(1.8; 1.9; 2.2)              | 1.6 ± 0.2<br>(1.4; 1.5; 1.8)               | 1.7 ± 0.2<br>(1.5; 1.7; 1.9)               | 1.6 ± 0.2<br>(1.5; 1.5; 1.5)            | 1.8 ± 0.2<br>(1.6; 1.7; 1.8)              |
| Cu [µg/l]                        | 1027.3 ± 90.0<br>(971.7; 997.3; 1082.8)   | 1206.3 ± 135.4<br>(1067.2; 1240.1; 1286.3) | 1214.8 ± 104.3<br>(1103.3; 1231.0; 1310.1) | 876.8 ± 10.6<br>(869.3; 876.8; 884.3)   | 1078.6 ± 106.6<br>(992.5; 1073.6; 1164.1) |
| Zn [µg/l]                        | 720.8 ± 238.4<br>(517.2; 684.7; 884.4)    | 542.6 ± 182.3<br>(363.6; 506.2; 733.8)     | 494.8 ± 102.7<br>(408.2; 483.6; 581.4)     | 772.0 ± 75.9<br>(718.3; 772.0; 825.7)   | 646.8 ± 128.5<br>(564.8; 641.5; 728.8)    |
| Cu/Zn ratio                      | 1.6 ± 0.5<br>(1.1; 1.6; 1.8)              | 1.9 ± 0.5<br>(1.4; 1.9; 2.3)               | 1.9 ± 0.5<br>(1.7; 2.1; 2.2)               | 1.6 ± 0.4<br>(1.3; 1.7; 1.8)            | 1.8 ± 0.3<br>(1.5; 1.7; 2.1)              |
| MDA[nmol/µL]                     | 2.4 ± 1.1<br>(1.9; 2.0; 2.4)              | 2.5 ± 0.7<br>(2.0; 2.3; 3.1)               | 2.5 ± 0.6<br>(2.2; 2.6; 2.9)               | 2.1 ± 0.4<br>(2.0; 2.3; 2.4)            | 2.2 ± 0.5<br>(1.8; 2.2; 2.5)              |
| SODs [U/ml]                      | 9.1 ± 2.7<br>(7.8; 8.8; 10.2)             | 10.2 ± 3.8<br>(7.2; 9.7; 11.5)             | 9.0 ± 1.1<br>(8.2; 8.9; 9.5)               | 9.4 ± 3.0<br>(6.9; 8.4; 12.0)           | 9.3 ± 1.5<br>(8.0; 9.4; 10.7)             |
| TAC [µM CRE]                     | 1125.5 ± 329.2<br>(870.2; 1077.6; 1288.4) | 961.5 ± 329.1<br>(659.8; 800.7; 1308.6)    | 773.0 ± 475.6<br>(685.6; 734.1; 769.8)     | 808.7 ± 684.5<br>(371.7; 692.9; 1245.6) | 863.3 ± 241.5<br>(709.0; 783.5; 988.4)    |
| Cp [mg/dl]                       | 19.5 ± 5.6<br>(15.3; 18.7; 25.1)          | 25.1 ± 8.2<br>(19.0; 26.3; 31.2)           | 25.0 ± 7.5<br>(20.2; 23.5; 26.0)           | 21.9 ± 11.6<br>(12.2; 27.1; 29.8)       | 19.5 ± 4.2<br>(16.9; 18.3; 22.2)          |
| hs-CRP [mg/dl]                   | 116.6 ± 12.8<br>(105.9; 114.6; 127.2)     | 151.6 ± 48.4<br>(110.8; 157.7; 192.3)      | 139.0 ± 26.8<br>(123.4; 130.2; 154.5)      | 134.7 ± 0.0<br>(134.7; 134.7; 134.7)    | 97.3 ± 51.5<br>(42.6; 132.6; 133.6)       |
| IL-6 [pg/ml]                     | 83.7 ± 9.0<br>(74.6; 83.8; 92.7)          | 53.5 ± 53.5<br>(53.5; 53.5; 53.5)          | 71.3 ± 43.5<br>(40.5; 71.3; 102.1)         | 55.4 ± 35.6<br>(41.2; 56.3; 87.6)       | 38.9 ± 9.9<br>(31.9; 38.9; 45.9)          |

The data were presented as mean ± standard deviation and upper quartile, median, lower quartile.

**Table S2.** The concentration of metals (Cu, Zn), MT, Cp and markers of inflammation and oxidative stress in the group of healthy subjects and AP patients in terms of sex.

| Parameters<br>in erythrocyte lysate | Healthy subjects                                  |                                                  |               | Patients with AP                                  |                                                       |        |
|-------------------------------------|---------------------------------------------------|--------------------------------------------------|---------------|---------------------------------------------------|-------------------------------------------------------|--------|
|                                     | Women<br>(n=26)                                   | Men<br>(n=25)                                    | p             | Women<br>(n=13)                                   | Men<br>(n=27)                                         | p      |
| MT [ng/g Hb]                        | 11.5 ± 3.2<br>(9.5; <b>10.3</b> ; 11.9)           | 10.2 ± 2.3<br>(8.6; <b>9.5</b> ; 10.7)           | 0.1445        | 28.2 ± 5.2 *<br>(25.6; <b>27.9</b> ; 30.7)        | 28.9 ± 6.6 **<br>(24.9; <b>28.0</b> ; 31.4)           | 0.1837 |
| SODs [U/g Hb]                       | 158.7 ± 54.3<br>(114.3; <b>144.2</b> ; 190.9)     | 140.5 ± 57.0<br>(96.0; <b>133.1</b> ; 165.3)     | 0.2965        | 422.2 ± 92.3 *<br>(332.6; <b>431.6</b> ; 479.0)   | 417.9 ± 74.0 **<br>(374.2; <b>399.3</b> ; 448.1)      | 0.8877 |
| Parameters<br>in plasma             | Women<br>(n=26)                                   | Men<br>(n=25)                                    | p             | Women<br>(n=26)                                   | Men<br>(n=25)                                         | p      |
| MT [ng/ml]                          | 1.8 ± 0.3<br>(1.7; <b>1.7</b> ; 1.8)              | 1.7 ± 0.1<br>(1.6; <b>1.7</b> ; 1.7)             | 0.1134        | 1.6 ± 0.2 *<br>(1.5; <b>1.6</b> ; 1.9)            | 1.7 ± 0.2<br>(1.5; <b>1.7</b> ; 1.8)                  | 0.3395 |
| Cu [µg/l]                           | 1056.8 ± 126.1<br>(977.7; <b>1038.8</b> ; 1110.7) | 1001.2 ± 179.0<br>(838.4; <b>991.9</b> ; 1089.5) | 0.2260        | 1053.6 ± 187.7<br>(952.3; <b>1003.9</b> ; 1073.6) | 1149.6 ± 137.0 **<br>(1067.2; <b>1161.3</b> ; 1240.1) | 0.8132 |
| Zn [µg/l]                           | 911.2 ± 142.6<br>(838.9; <b>898.7</b> ; 992.7)    | 1000.2 ± 84.7<br>(970.9; <b>1014.3</b> ; 1043.3) | <b>0.0358</b> | 672.3 ± 167.7 *<br>(517.2; <b>663.1</b> ; 825.7)  | 664.5 ± 145.6 **<br>(544.7; <b>664.0</b> ; 757.8)     | 0.1541 |
| Cu/Zn ratio                         | 1.2 ± 0.2<br>(1.0; <b>1.2</b> ; 1.3)              | 1.0 ± 0.1<br>(0.9; <b>1.0</b> ; 1.1)             | <b>0.0012</b> | 1.6 ± 0.3 *<br>(1.3; <b>1.7</b> ; 1.8)            | 1.7 ± 0.4 **<br>(1.3; <b>1.6</b> ; 2.1)               | 0.6183 |
| MDA [nmol/µl]                       | 0.9 ± 0.6<br>(0.4; <b>0.7</b> ; 1.3)              | 0.7 ± 0.6<br>(0.2; <b>0.4</b> ; 0.9)             | 0.1755        | 2.8 ± 1.0 *<br>(2.2; <b>2.5</b> ; 3.2)            | 2.9 ± 1.1 **<br>(2.2; <b>2.7</b> ; 3.4)               | 0.1538 |
| SODs [U/ml]                         | 10.3 ± 1.5<br>(9.0; <b>10.4</b> ; 11.4)           | 9.7 ± 0.9<br>(9.0; <b>9.7</b> ; 10.4)            | 0.2215        | 9.4 ± 2.3<br>(7.7; <b>9.5</b> ; 10.8)             | 8.6 ± 2.9 **<br>(7.1; <b>8.0</b> ; 9.8)               | 0.3834 |
| TAC [µM CRE]                        | 29.0 ± 16.0<br>(16.4; <b>23.3</b> ; 45.0)         | 34.7 ± 7.4<br>(28.9; <b>32.2</b> ; 43.0)         | 0.5679        | 869.9 ± 391.8 *<br>(708.9; <b>782.6</b> ; 988.4)  | 895.8 ± 361.6 **<br>(692.8; <b>854.8</b> ; 1211.4)    | 0.7678 |
| Cp [mg/dl]                          | 31.3 ± 12.8<br>(22.2; <b>30.8</b> ; 403)          | 23.9 ± 8.5<br>(17.8; <b>24.7</b> ; 26.0)         | 0.0726        | 23.5 ± 7.2<br>(17.5; <b>25.8</b> ; 26.8)          | 22.5 ± 7.8<br>(17.9; <b>20.8</b> ; 28.2)              | 0.7233 |
| hs-CRP [mg/dl]                      | 0.5 ± 0.2<br>(0.4; <b>0.5</b> ; 0.7)              | 0.6 ± 0.3<br>(0.4; <b>0.5</b> ; 0.7)             | 0.1975        | 116.5 ± 50.2 *<br>(80.0; <b>132.1</b> ; 145.0)    | 134.4 ± 30.2 **<br>(114.6; <b>130.2</b> ; 138.5)      | 0.5828 |
| IL-6 [pg/ml]                        | 0.5 ± 0.4<br>(0.2; <b>0.3</b> ; 0.6)              | 0.6 ± 0.3<br>(0.4; <b>0.5</b> ; 0.7)             | 0.8178        | 63.4 ± 27.7 *<br>(31.9; <b>74.6</b> ; 83.8)       | 54.0 ± 32.5 **<br>(30.9; <b>45.9</b> ; 92.7)          | 0.1779 |

The data were presented as mean ± standard deviation and upper quartile, median, lower quartile. \*statistically significant compared to healthy women \*\* statistically significant compared to healthy men

**Table S3.** Correlation coefficients for the group of healthy subjects and AP patients in terms of rs11640851 in MT1A gene.

| NON-SMOKING HEALTHY SUBJECTS                 |         |        |
|----------------------------------------------|---------|--------|
| Correlated parameters                        | r       | p      |
| <b>Individuals with the CA genotype:</b>     |         |        |
| Cu [µg/l] : Cp [mg/l]                        | 0.1909  | 0.0005 |
| Cu/Zn : Cp [mg/l]                            | 0.6273  | 0.0359 |
| <b>Individuals with the AA genotype:</b>     |         |        |
| Cu/Zn : MT [ng/l]                            | 0.9000  | 0.0374 |
| SMOKING HEALTHY SUBJECTS                     |         |        |
| <b>Individuals with the CC genotype:</b>     |         |        |
| MT [ng/g Hb] : Cp [mg/l]                     | 0.9000  | 0.0473 |
| NON-SMOKING PATIENTS WITH ACUTE PANCREATITIS |         |        |
| <b>Individuals with the CA genotype:</b>     |         |        |
| MT [ng/g Hb] : Zn [µg/l]                     | 0.9000  | 0.0384 |
| <b>Individuals with the AA genotype:</b>     |         |        |
| Cp [mg/l] : Cu/Zn                            | 0.9000  | 0.0370 |
| SMOKING PATIENTS WITH ACUTE PANCREATITIS     |         |        |
| <b>Individuals with the CA genotype:</b>     |         |        |
| MT [ng/l] : Cu [µg/l]                        | 0.8286  | 0.0416 |
| <b>Individuals with the AA genotype:</b>     |         |        |
| MT [ng/g Hb]: Zn [µg/l]                      | 0.9000  | 0.0474 |
| <b>Individuals with the CC genotype:</b>     |         |        |
| Cp [mg/l] : TAC [µM CRE]                     | -0.8858 | 0.0188 |

**Table S4.** Correlation coefficients for the group of healthy subjects and AP patients in terms of rs964372 in MT1B gene.

| NON-SMOKING HEALTHY SUBJECTS             |        |        |
|------------------------------------------|--------|--------|
| Correlated parameters                    | r      | p      |
| <b>Individuals with the GG genotype:</b> |        |        |
| Cu [µg/l] : Cp [mg/l]                    | 0.8857 | 0.0188 |
| Cu/Zn : Cp [mg/l]                        | 0.8214 | 0.0235 |
| <b>Individuals with the CC genotype:</b> |        |        |
| Cu [µg/l] : Cp [mg/l]                    | 0.8286 | 0.0415 |
| SMOKING HEALTHY SUBJECTS                 |        |        |
| <b>Individuals with the CG genotype:</b> |        |        |
| MT [ng/l] : Cu [µg/l]                    | 0.7381 | 0.0366 |
| <b>Individuals with the CC genotype:</b> |        |        |
| Cp [mg/l] : MT [ng/l]                    | 0.8286 | 0.0415 |
| Cp [mg/l] : Cu/Zn                        | 0.9529 | 0.0048 |
| SMOKING PATIENTS WITH ACUTE PANCREATITIS |        |        |
| <b>INDIVIDUALS WITH THE CG GENOTYPE:</b> |        |        |
| Cu/Zn : MDA [µmol/l]                     | 0.7676 | 0.0036 |

**Table S5.** Correlation coefficients for the group of healthy subjects and AP patients in terms of rs10636 in MT2A gene.

| NON-SMOKING HEALTHY SUBJECTS             |        |        |
|------------------------------------------|--------|--------|
| Correlated parameters                    | r      | p      |
| <b>Individuals with the GC genotype:</b> |        |        |
| MT [ng/g Hb] : Cd [µg/l]                 | 0.6225 | 0.0132 |
| Cp [mg/l] : Cu [µg/l]                    | 0.5750 | 0.0249 |
| Cp [mg/l] : IL-6 [ng/l]                  | 0.6606 | 0.0269 |
| <b>Individuals with the CC genotype:</b> |        |        |
| MT [ng/l] : Cu [µg/l]                    | 0.9000 | 0.0374 |
| SMOKING HEALTHY SUBJECTS                 |        |        |
| <b>Individuals with the GC genotype:</b> |        |        |
| Cp [mg/l] : MT [ng/l] :                  | 0.5889 | 0.0306 |
| Cp [mg/l] : Cu [µg/l]                    | 0.6593 | 0.0140 |
